# Supplementary material for: Suppressed Histone H3 Lysine 18 Acetylation Is Involved in Arsenic-Induced Liver Fibrosis in Rats by Triggering the Dedifferentiation of Liver Sinusoidal Endothelial Cells
Source: MDPI journal article supplement (doi:10.3390/toxics11110928), 2023-11-13
Supplement: s1 [file s1]

**Table S1 The primers for ChIP-qPCR.**

| Genes         | Location<br>(TSS) |         | Primer (5'-3')           |
|---------------|-------------------|---------|--------------------------|
| <i>Fcgr2b</i> |                   |         |                          |
| CHIP1         | -2897~-2802       | Forward | TCCCAAAGAAGAAAAAGCCAGAGC |
|               |                   | Reverse | AAGTTTCTTGGTCATGGTGGACTA |
| CHIP2         | -1776~-1674       | Forward | AGCAGGCAGGTCTCTGGATA     |
|               |                   | Reverse | CTGCCCTCTACCACAAAGCA     |
| CHIP3         | -1246~-1087       | Forward | AAGAGGCCTCAGAAAAGCTCC    |
|               |                   | Reverse | TGCCACTGGTAAGGAACCAAC    |
| CHIP4         | -716~-553         | Forward | CGGGTAGCCTGAAATGCTCA     |
|               |                   | Reverse | TCCCCTGAAGTGCCTAGTGA     |
| CHIP5         | 219~306           | Forward | AACCAACGTGGCCTAGGAAG     |
|               |                   | Reverse | AAGGCCGACCAGGTTGTTAC     |
| CHIP6         | 1145~1284         | Forward | CTGGCGAGAACTCCCAAGAA     |
|               |                   | Reverse | CAGGAGCAAAGAAGATCCCGT    |
| CHIP7         | 2109~2199         | Forward | GAACACGTTAAGGGGACCCA     |
|               |                   | Reverse | CAACTTGTCGTGTTGCCCAT     |
| CHIP8         | 2779~2920         | Forward | GGTGACCACATGGTGCATTC     |
|               |                   | Reverse | TTTGATTCCCCGGCTTGTGG     |
| <i>Lyve1</i>  |                   |         |                          |
| CHIP1         | -2828~-2746       | Forward | GCTCAGCTGTGGCAATTTGT     |
|               |                   | Reverse | TGCAGGCCAGTTTTACTCCA     |
| CHIP2         | -1144~-1046       | Forward | TCCAATCACCTGCCTCGAAC     |
|               |                   | Reverse | CTAAGCAGCCGCCTACTCTC     |
| CHIP3         | -394~-314         | Forward | GCCGTTTCAGACCGCCTTTAT    |
|               |                   | Reverse | ACTTAGGAGCAACCGAACGA     |
| CHIP4         | 529~620           | Forward | TGGGAATACGGGAGACTCGT     |
|               |                   | Reverse | ATTTGGAGAGTCTGGCGGTG     |
| CHIP5         | 1096~1231         | Forward | CTGCTGAGGATGCCCTGAAA     |
|               |                   | Reverse | GTTCTGGCATTGCAGTGGTG     |
| CHIP6         | 1588~1738         | Forward | TGAGCCACATCCCTAGCTCT     |
|               |                   | Reverse | TCTGTACCTCTCCTCGCCTC     |
| CHIP7         | 2403~2528         | Forward | TACACGGCTGGAATGCCTTT     |
|               |                   | Reverse | TTGACACGCTTCTCTGGGAC     |
| CHIP8         | 3238~3339         | Forward | CCATCAGGCAGTACAAGCGT     |
|               |                   | Reverse | CCCTGGTTTGTGAGACTGGT     |

**Table S2 The primers for qPCR.**

| <b>Genes</b>      | <b>Products length<br/>(bp)</b> |         | <b>Primer (5'-3')</b>  |
|-------------------|---------------------------------|---------|------------------------|
| <i>Fcgr2b</i>     | 83                              | Forward | CACTGATGTGCGAAGGGAC    |
|                   |                                 | Reverse | GGCTTGATGCCAGATGGA     |
| <i>Lyve1</i>      | 154                             | Forward | GTTGAAAGTGGAGCAGCAT    |
|                   |                                 | Reverse | TGTTTGTGAAAGGGAAGG     |
| <i>Stabilin-1</i> | 202                             | Forward | ACTCTACCTTCTGCCTATACCG |
|                   |                                 | Reverse | TAGCCGTCACCCACCTCA     |
| <i>Stabilin-2</i> | 174                             | Forward | GGCTCTTTACCAAGTCTACTC  |
|                   |                                 | Reverse | TGTGGCTTTCTTCTCCCT     |
| <i>Gapdh</i>      | 96                              | Forward | GGCTCTCTGCTCCTCCC      |
|                   |                                 | Reverse | CCGTTACACCGACCTT       |

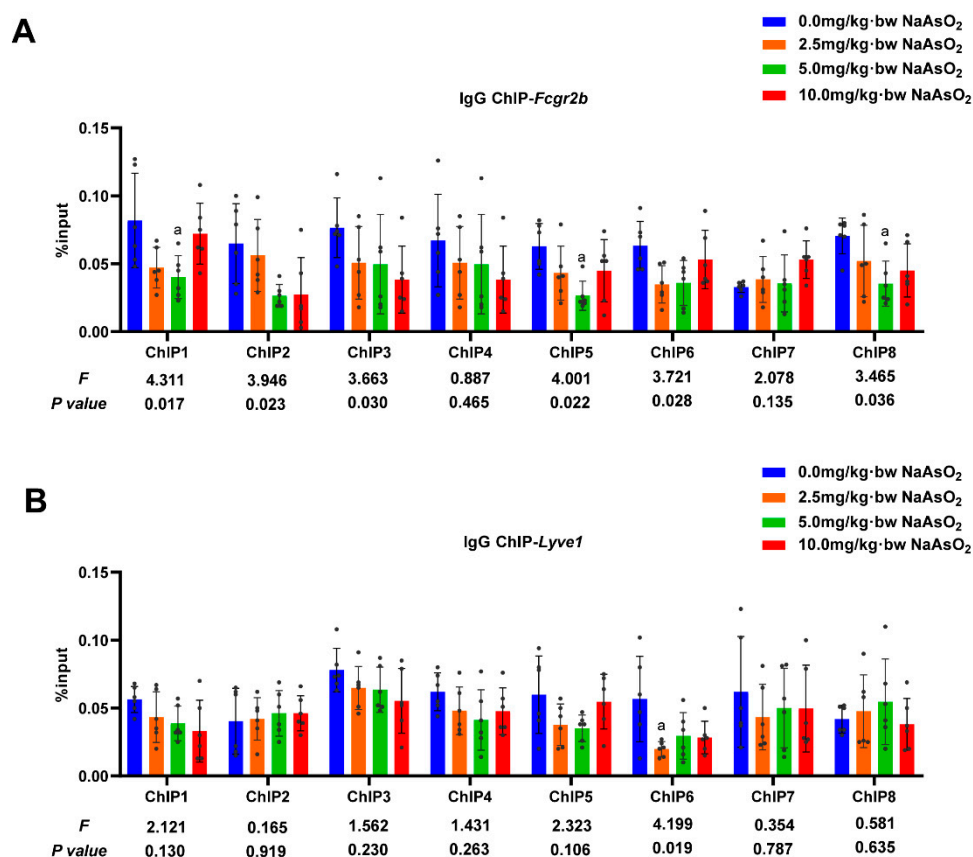

Fig.S1 The enrichment of IgG in promoters of *Fcgr2b* and *Lyve1* genes in rat liver. (A): The enrichment of IgG in promoters of *Fcgr2b* genes in rat liver; (B): The enrichment of IgG in promoters of *Lyve1* genes in rat liver. The statistic "*F*" is derived from a one-way analysis of variance (one-way ANOVAs). The notation "a" signifies that there are significant differences ( $P<0.05$ ) when compared with the three groups from 0.0 mg/kg to 5.0 mg/kg using Bonferroni correction, respectively.

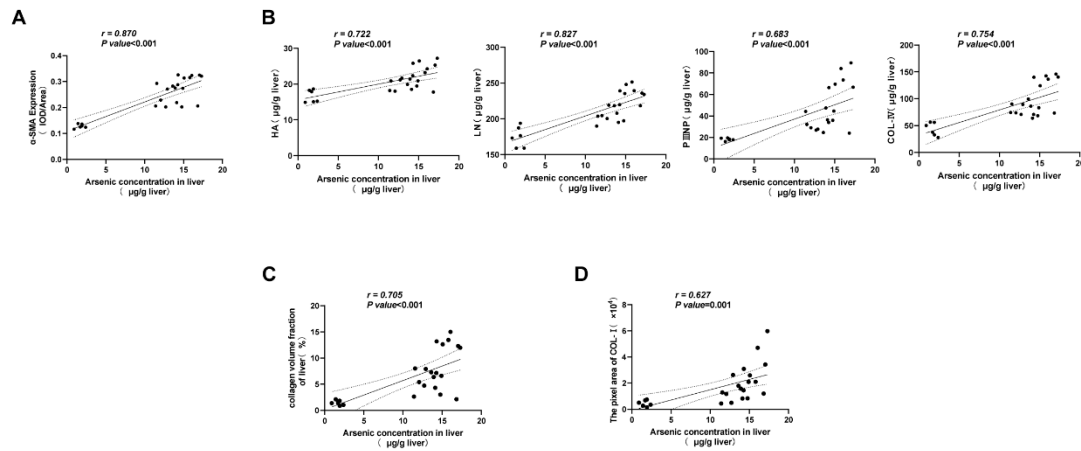

Fig.S2 The relationships of arsenic concentration, HSCs activation, and collagen deposition in the liver. The Pearson correlation analysis was used to assess the correlations between the arsenic concentration in rat liver with (A)the HSCs activation marker ( $\alpha$ -SMA expression), (B)the ECMs levels (including hyaluronidase (HA), laminin (LN), procollagen III (PN IIIP) and collagen IV (COL-IV)), (C) the area of collagen deposition and (D)the content of Col I in the liver.

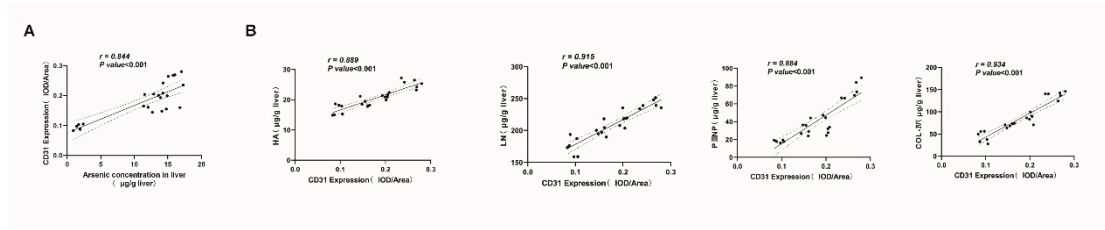

Fig.S3 The associations of arsenic concentration, LSECs dedifferentiation, and the ECMs levels in the liver. (A) The Pearson correlation analysis was used to assess the correlations between the arsenic concentration in rat liver and the LSECs dedifferentiation indicator (CD31 expression). (B) The Pearson correlation analysis was used to assess the associations of CD31 expression with the ECMs levels (including HA, LN, PN IIIp and COL-IV)

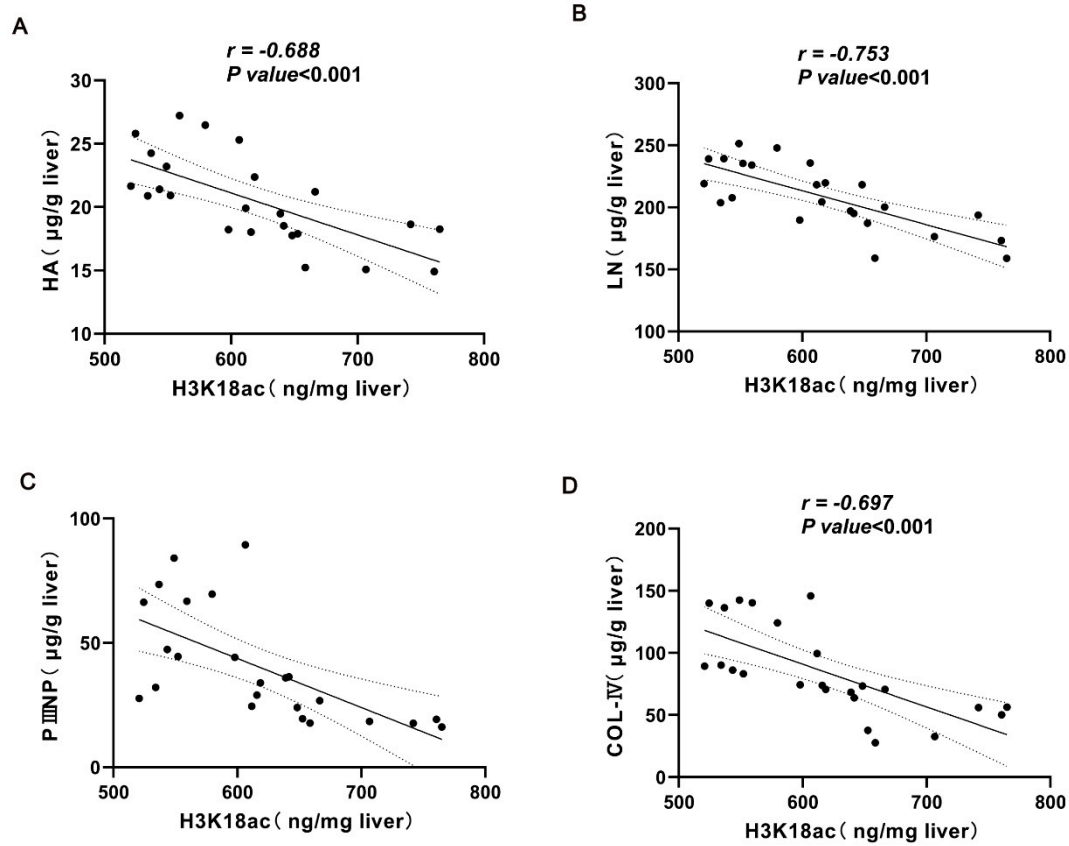

Fig.S4 The relationships of H3K18ac and the ECMs levels in the liver. The Pearson correlation analysis was used to assess the associations of the total level of H3K18ac modification in liver tissue with the ECMs levels, including (A)HA, (B)LN, (C)PIIINP and (D)COL-IV.
